# Supplementary material
Source: PubMed Central journal article supplement (PMC2680024)
Supplement: NIHMS100956-supplement-3.pdf [file NIHMS100956-supplement-3.pdf]

Rotamer probabilities for valine alpha helix region by phi (vertical) and psi (horizontal) see methods for rotamer nomenclature

|       |     | -50   |       |       | -40   |       |       | -30   |       |       | -20   |       |       |
|-------|-----|-------|-------|-------|-------|-------|-------|-------|-------|-------|-------|-------|-------|
|       |     | M     | P     | T     | M     | P     | T     | M     | P     | T     | M     | P     | T     |
| Ceder |     | 0.438 | 0.300 | 0.261 | 0.514 | 0.302 | 0.183 | 0.597 | 0.274 | 0.129 | 0.695 | 0.219 | 0.085 |
| Charm |     | 0.230 | 0.143 | 0.628 | 0.490 | 0.189 | 0.321 | 0.742 | 0.141 | 0.117 | 0.889 | 0.079 | 0.032 |
| Amber |     | 0.544 | 0.097 | 0.360 | 0.747 | 0.091 | 0.161 | 0.885 | 0.065 | 0.050 | 0.950 | 0.036 | 0.015 |
| Hf    |     | 0.094 | 0.125 | 0.781 | 0.297 | 0.200 | 0.503 | 0.566 | 0.262 | 0.173 | 0.765 | 0.195 | 0.040 |
| Dft   |     | 0.130 | 0.150 | 0.719 | 0.328 | 0.200 | 0.472 | 0.563 | 0.233 | 0.204 | 0.745 | 0.192 | 0.063 |
| Mp2   |     | 0.070 | 0.180 | 0.750 | 0.231 | 0.313 | 0.456 | 0.466 | 0.379 | 0.155 | 0.681 | 0.282 | 0.037 |
| Dun   | -70 | 0.005 | 0.007 | 0.988 | 0.036 | 0.040 | 0.925 | 0.189 | 0.167 | 0.644 | 0.524 | 0.298 | 0.177 |
| Ceder |     | 0.451 | 0.308 | 0.241 | 0.526 | 0.307 | 0.167 | 0.613 | 0.272 | 0.116 | 0.720 | 0.205 | 0.074 |
| Charm |     | 0.271 | 0.153 | 0.576 | 0.547 | 0.160 | 0.293 | 0.773 | 0.133 | 0.094 | 0.913 | 0.065 | 0.022 |
| Amber |     | 0.581 | 0.102 | 0.318 | 0.775 | 0.094 | 0.132 | 0.897 | 0.062 | 0.040 | 0.957 | 0.032 | 0.011 |
| Hf    |     | 0.107 | 0.161 | 0.732 | 0.316 | 0.232 | 0.452 | 0.568 | 0.281 | 0.151 | 0.785 | 0.183 | 0.032 |
| Dft   |     | 0.144 | 0.176 | 0.680 | 0.325 | 0.220 | 0.455 | 0.549 | 0.262 | 0.189 | 0.758 | 0.187 | 0.054 |
| Mp2   |     | 0.074 | 0.224 | 0.702 | 0.236 | 0.352 | 0.413 | 0.465 | 0.398 | 0.136 | 0.710 | 0.258 | 0.032 |
| Dun   | -60 | 0.005 | 0.012 | 0.983 | 0.030 | 0.052 | 0.918 | 0.159 | 0.222 | 0.619 | 0.451 | 0.393 | 0.156 |
| Ceder |     | 0.469 | 0.314 | 0.217 | 0.545 | 0.305 | 0.149 | 0.636 | 0.264 | 0.100 | 0.744 | 0.196 | 0.060 |
| Charm |     | 0.302 | 0.160 | 0.537 | 0.588 | 0.161 | 0.251 | 0.820 | 0.110 | 0.069 | 0.936 | 0.049 | 0.015 |
| Amber |     | 0.625 | 0.107 | 0.268 | 0.804 | 0.094 | 0.102 | 0.912 | 0.059 | 0.030 | 0.965 | 0.028 | 0.007 |
| Hf    |     | 0.123 | 0.197 | 0.679 | 0.335 | 0.266 | 0.399 | 0.587 | 0.289 | 0.124 | 0.814 | 0.166 | 0.020 |
| Dft   |     | 0.147 | 0.201 | 0.652 | 0.341 | 0.255 | 0.404 | 0.574 | 0.269 | 0.157 | 0.789 | 0.175 | 0.036 |
| Mp2   |     | 0.080 | 0.253 | 0.667 | 0.244 | 0.355 | 0.401 | 0.495 | 0.381 | 0.123 | 0.747 | 0.229 | 0.024 |
| Dun   | -50 | 0.005 | 0.028 | 0.967 | 0.029 | 0.106 | 0.865 | 0.129 | 0.375 | 0.497 | 0.279 | 0.576 | 0.145 |
| Ceder |     | 0.490 | 0.315 | 0.195 | 0.570 | 0.299 | 0.131 | 0.665 | 0.251 | 0.084 | 0.780 | 0.173 | 0.047 |
| Charm |     | 0.356 | 0.149 | 0.495 | 0.640 | 0.152 | 0.209 | 0.851 | 0.094 | 0.055 | 0.953 | 0.036 | 0.011 |
| Amber |     | 0.666 | 0.111 | 0.223 | 0.832 | 0.091 | 0.077 | 0.928 | 0.052 | 0.020 | 0.973 | 0.023 | 0.004 |
| Hf    |     | 0.146 | 0.237 | 0.617 | 0.364 | 0.310 | 0.326 | 0.628 | 0.293 | 0.078 | 0.824 | 0.167 | 0.009 |
| Dft   |     | 0.172 | 0.235 | 0.593 | 0.370 | 0.289 | 0.341 | 0.614 | 0.279 | 0.107 | 0.811 | 0.176 | 0.013 |
| Mp2   |     | 0.086 | 0.276 | 0.638 | 0.252 | 0.377 | 0.371 | 0.532 | 0.373 | 0.095 | 0.764 | 0.224 | 0.012 |
| Dun   | -40 | 0.032 | 0.073 | 0.894 | 0.082 | 0.287 | 0.632 | 0.147 | 0.612 | 0.241 | 0.390 | 0.285 | 0.325 |

Rotamer probabilities for valine beta strand region by phi (vertical) and psi (horizontal) see methods for rotamer nomenclature

|       |      | 110   |       |       | 120   |       |       | 130   |       |       | 140   |       |       | 150   |       |       | 160   |       |
|-------|------|-------|-------|-------|-------|-------|-------|-------|-------|-------|-------|-------|-------|-------|-------|-------|-------|-------|
|       |      | M     | P     | T     | M     | P     | T     | M     | P     | T     | M     | P     | T     | M     | P     | T     | M     | P     |
| Ceder |      | 0.376 | 0.230 | 0.395 | 0.423 | 0.238 | 0.339 | 0.452 | 0.270 | 0.278 | 0.503 | 0.272 | 0.225 | 0.602 | 0.238 | 0.160 | 0.746 | 0.161 |
| Charm |      | 0.055 | 0.055 | 0.890 | 0.097 | 0.106 | 0.797 | 0.177 | 0.187 | 0.636 | 0.310 | 0.229 | 0.461 | 0.542 | 0.241 | 0.216 | 0.777 | 0.167 |
| Amber |      | 0.212 | 0.041 | 0.747 | 0.273 | 0.062 | 0.665 | 0.390 | 0.090 | 0.520 | 0.566 | 0.104 | 0.330 | 0.754 | 0.098 | 0.148 | 0.884 | 0.071 |
| Hf    |      | 0.035 | 0.036 | 0.929 | 0.065 | 0.054 | 0.880 | 0.161 | 0.088 | 0.751 | 0.392 | 0.119 | 0.489 | 0.728 | 0.107 | 0.165 | 0.894 | 0.075 |
| Dft   |      | 0.048 | 0.048 | 0.904 | 0.080 | 0.069 | 0.851 | 0.158 | 0.108 | 0.733 | 0.332 | 0.160 | 0.508 | 0.574 | 0.172 | 0.255 | 0.767 | 0.153 |
| Mp2   |      | 0.030 | 0.036 | 0.934 | 0.055 | 0.055 | 0.890 | 0.126 | 0.103 | 0.771 | 0.313 | 0.157 | 0.530 | 0.627 | 0.163 | 0.210 | 0.852 | 0.106 |
| Dun   | -110 | 0.004 | 0.004 | 0.992 | 0.005 | 0.007 | 0.987 | 0.025 | 0.034 | 0.941 | 0.101 | 0.074 | 0.825 | 0.516 | 0.081 | 0.403 | 0.885 | 0.052 |
| Ceder |      | 0.387 | 0.231 | 0.382 | 0.429 | 0.249 | 0.321 | 0.464 | 0.262 | 0.274 | 0.527 | 0.258 | 0.215 | 0.629 | 0.217 | 0.154 | 0.746 | 0.167 |
| Charm |      | 0.043 | 0.055 | 0.902 | 0.072 | 0.106 | 0.823 | 0.123 | 0.225 | 0.652 | 0.283 | 0.263 | 0.454 | 0.531 | 0.265 | 0.203 | 0.746 | 0.200 |
| Amber |      | 0.220 | 0.046 | 0.734 | 0.283 | 0.069 | 0.649 | 0.399 | 0.097 | 0.503 | 0.572 | 0.111 | 0.317 | 0.752 | 0.105 | 0.143 | 0.880 | 0.076 |
| Hf    |      | 0.033 | 0.042 | 0.926 | 0.062 | 0.064 | 0.874 | 0.153 | 0.106 | 0.740 | 0.386 | 0.152 | 0.462 | 0.707 | 0.136 | 0.158 | 0.873 | 0.097 |
| Dft   |      | 0.044 | 0.055 | 0.901 | 0.079 | 0.084 | 0.837 | 0.158 | 0.133 | 0.709 | 0.308 | 0.191 | 0.501 | 0.540 | 0.208 | 0.252 | 0.735 | 0.186 |
| Mp2   |      | 0.028 | 0.036 | 0.936 | 0.053 | 0.061 | 0.886 | 0.125 | 0.115 | 0.760 | 0.308 | 0.181 | 0.510 | 0.625 | 0.176 | 0.199 | 0.843 | 0.117 |
| Dun   | -120 | 0.004 | 0.006 | 0.989 | 0.010 | 0.013 | 0.977 | 0.038 | 0.048 | 0.914 | 0.144 | 0.097 | 0.760 | 0.600 | 0.084 | 0.316 | 0.929 | 0.026 |
| Ceder |      | 0.406 | 0.236 | 0.358 | 0.447 | 0.250 | 0.303 | 0.494 | 0.251 | 0.254 | 0.545 | 0.256 | 0.200 | 0.633 | 0.222 | 0.145 | 0.745 | 0.170 |
| Charm |      | 0.044 | 0.080 | 0.876 | 0.068 | 0.153 | 0.779 | 0.133 | 0.264 | 0.603 | 0.268 | 0.354 | 0.378 | 0.497 | 0.341 | 0.162 | 0.730 | 0.227 |
| Amber |      | 0.212 | 0.053 | 0.735 | 0.278 | 0.079 | 0.643 | 0.397 | 0.112 | 0.492 | 0.569 | 0.128 | 0.303 | 0.748 | 0.120 | 0.132 | 0.873 | 0.088 |
| Hf    |      | 0.028 | 0.057 | 0.916 | 0.054 | 0.090 | 0.856 | 0.136 | 0.153 | 0.712 | 0.344 | 0.225 | 0.431 | 0.639 | 0.217 | 0.144 | 0.807 | 0.167 |
| Dft   |      | 0.039 | 0.073 | 0.888 | 0.068 | 0.114 | 0.818 | 0.137 | 0.183 | 0.680 | 0.271 | 0.253 | 0.476 | 0.478 | 0.295 | 0.227 | 0.649 | 0.279 |
| Mp2   |      | 0.024 | 0.043 | 0.933 | 0.047 | 0.076 | 0.877 | 0.112 | 0.146 | 0.742 | 0.276 | 0.236 | 0.488 | 0.580 | 0.235 | 0.185 | 0.796 | 0.169 |
| Dun   | -130 | 0.001 | 0.013 | 0.986 | 0.009 | 0.025 | 0.966 | 0.040 | 0.081 | 0.878 | 0.156 | 0.165 | 0.679 | 0.625 | 0.131 | 0.244 | 0.946 | 0.018 |
| Ceder |      | 0.412 | 0.273 | 0.315 | 0.449 | 0.292 | 0.259 | 0.487 | 0.298 | 0.214 | 0.538 | 0.291 | 0.172 | 0.621 | 0.265 | 0.115 | 0.735 | 0.200 |
| Charm |      | 0.049 | 0.166 | 0.785 | 0.058 | 0.295 | 0.647 | 0.104 | 0.450 | 0.446 | 0.198 | 0.563 | 0.239 | 0.363 | 0.549 | 0.088 | 0.540 | 0.437 |
| Amber |      | 0.222 | 0.072 | 0.706 | 0.253 | 0.113 | 0.634 | 0.372 | 0.160 | 0.468 | 0.545 | 0.184 | 0.271 | 0.723 | 0.170 | 0.108 | 0.845 | 0.127 |
| Hf    |      | 0.026 | 0.102 | 0.873 | 0.043 | 0.165 | 0.792 | 0.105 | 0.282 | 0.613 | 0.259 | 0.410 | 0.331 | 0.475 | 0.427 | 0.098 | 0.613 | 0.371 |
| Dft   |      | 0.034 | 0.124 | 0.842 | 0.053 | 0.184 | 0.763 | 0.108 | 0.291 | 0.601 | 0.204 | 0.424 | 0.372 | 0.342 | 0.502 | 0.157 | 0.470 | 0.485 |
| Mp2   |      | 0.018 | 0.069 | 0.912 | 0.036 | 0.121 | 0.843 | 0.087 | 0.234 | 0.679 | 0.212 | 0.378 | 0.410 | 0.443 | 0.408 | 0.150 | 0.638 | 0.335 |
| Dun   | -140 | 0.003 | 0.021 | 0.976 | 0.006 | 0.054 | 0.940 | 0.030 | 0.171 | 0.799 | 0.138 | 0.311 | 0.551 | 0.570 | 0.231 | 0.199 | 0.922 | 0.040 |

| T     |
|-------|
| 0.093 |
| 0.056 |
| 0.045 |
| 0.031 |
| 0.080 |
| 0.042 |
| 0.064 |
| 0.087 |
| 0.054 |
| 0.044 |
| 0.029 |
| 0.079 |
| 0.039 |
| 0.045 |
| 0.085 |
| 0.042 |
| 0.039 |
| 0.026 |
| 0.073 |
| 0.035 |
| 0.036 |
| 0.065 |
| 0.023 |
| 0.028 |
| 0.016 |
| 0.045 |
| 0.026 |
| 0.038 |

Rotamer probabilities for isoleucine alpha helix region by phi (vertical) and psi (horizontal) see methods for rotamer nomenclatur

|       |     | -50   |       |       |       |       |       |       |       | -40   |       |       |       |       |       |       |       |       |
|-------|-----|-------|-------|-------|-------|-------|-------|-------|-------|-------|-------|-------|-------|-------|-------|-------|-------|-------|
|       |     | MM    | MP    | MT    | PM    | PP    | PT    | TM    | TP    | TT    | MM    | MP    | MT    | PM    | PP    | PT    | TM    | TP    |
| Ceder |     | 0.146 | 0.039 | 0.079 | 0.118 | 0.015 | 0.154 | 0.015 | 0.311 | 0.123 | 0.103 | 0.026 | 0.050 | 0.144 | 0.029 | 0.208 | 0.009 | 0.298 |
| Charm |     | 0.280 | 0.033 | 0.218 | 0.045 | 0.003 | 0.116 | 0.003 | 0.162 | 0.141 | 0.137 | 0.016 | 0.102 | 0.078 | 0.009 | 0.269 | 0.002 | 0.194 |
| Amber |     | 0.075 | 0.008 | 0.038 | 0.103 | 0.008 | 0.193 | 0.006 | 0.309 | 0.260 | 0.030 | 0.003 | 0.012 | 0.137 | 0.012 | 0.315 | 0.003 | 0.280 |
| Hf    |     | 0.196 | 0.021 | 0.379 | 0.002 | 0.000 | 0.045 | 0.003 | 0.221 | 0.133 | 0.091 | 0.012 | 0.180 | 0.006 | 0.003 | 0.140 | 0.003 | 0.374 |
| Dft   |     | 0.154 | 0.027 | 0.281 | 0.004 | 0.001 | 0.063 | 0.007 | 0.319 | 0.144 | 0.079 | 0.016 | 0.144 | 0.009 | 0.004 | 0.137 | 0.006 | 0.420 |
| Mp2   |     | 0.180 | 0.038 | 0.177 | 0.002 | 0.000 | 0.018 | 0.007 | 0.479 | 0.099 | 0.086 | 0.020 | 0.080 | 0.007 | 0.003 | 0.054 | 0.005 | 0.601 |
| Dun   | -70 | 0.138 | 0.002 | 0.852 | 0.000 | 0.000 | 0.000 | 0.001 | 0.003 | 0.005 | 0.143 | 0.005 | 0.789 | 0.000 | 0.001 | 0.008 | 0.002 | 0.027 |
| Ceder |     | 0.138 | 0.034 | 0.071 | 0.128 | 0.018 | 0.157 | 0.015 | 0.315 | 0.124 | 0.091 | 0.022 | 0.047 | 0.145 | 0.031 | 0.218 | 0.008 | 0.305 |
| Charm |     | 0.258 | 0.029 | 0.176 | 0.051 | 0.003 | 0.144 | 0.003 | 0.166 | 0.169 | 0.122 | 0.014 | 0.069 | 0.088 | 0.010 | 0.306 | 0.002 | 0.204 |
| Amber |     | 0.060 | 0.006 | 0.029 | 0.107 | 0.009 | 0.211 | 0.006 | 0.316 | 0.257 | 0.023 | 0.002 | 0.009 | 0.139 | 0.014 | 0.335 | 0.003 | 0.275 |
| Hf    |     | 0.171 | 0.019 | 0.318 | 0.002 | 0.001 | 0.048 | 0.004 | 0.266 | 0.171 | 0.075 | 0.010 | 0.142 | 0.006 | 0.003 | 0.144 | 0.003 | 0.402 |
| Dft   |     | 0.132 | 0.025 | 0.236 | 0.004 | 0.001 | 0.063 | 0.008 | 0.359 | 0.170 | 0.067 | 0.015 | 0.118 | 0.009 | 0.004 | 0.133 | 0.008 | 0.444 |
| Mp2   |     | 0.159 | 0.031 | 0.143 | 0.002 | 0.000 | 0.019 | 0.008 | 0.521 | 0.116 | 0.076 | 0.017 | 0.065 | 0.007 | 0.003 | 0.057 | 0.006 | 0.609 |
| Dun   | -60 | 0.135 | 0.003 | 0.849 | 0.000 | 0.000 | 0.001 | 0.001 | 0.004 | 0.008 | 0.134 | 0.004 | 0.790 | 0.000 | 0.001 | 0.009 | 0.002 | 0.031 |
| Ceder |     | 0.111 | 0.029 | 0.057 | 0.139 | 0.021 | 0.178 | 0.015 | 0.306 | 0.144 | 0.073 | 0.019 | 0.039 | 0.161 | 0.039 | 0.219 | 0.007 | 0.319 |
| Charm |     | 0.195 | 0.023 | 0.215 | 0.033 | 0.002 | 0.107 | 0.004 | 0.237 | 0.184 | 0.118 | 0.012 | 0.080 | 0.068 | 0.008 | 0.240 | 0.003 | 0.267 |
| Amber |     | 0.045 | 0.004 | 0.021 | 0.118 | 0.010 | 0.231 | 0.006 | 0.324 | 0.241 | 0.017 | 0.001 | 0.007 | 0.146 | 0.018 | 0.357 | 0.003 | 0.263 |
| Hf    |     | 0.149 | 0.016 | 0.258 | 0.002 | 0.001 | 0.054 | 0.004 | 0.310 | 0.207 | 0.063 | 0.008 | 0.113 | 0.006 | 0.003 | 0.157 | 0.003 | 0.421 |
| Dft   |     | 0.123 | 0.023 | 0.192 | 0.005 | 0.001 | 0.067 | 0.010 | 0.387 | 0.192 | 0.060 | 0.013 | 0.095 | 0.009 | 0.005 | 0.141 | 0.007 | 0.457 |
| Mp2   |     | 0.151 | 0.027 | 0.123 | 0.003 | 0.001 | 0.021 | 0.009 | 0.540 | 0.126 | 0.076 | 0.016 | 0.061 | 0.007 | 0.003 | 0.067 | 0.006 | 0.583 |
| Dun   | -50 | 0.157 | 0.007 | 0.802 | 0.000 | 0.000 | 0.002 | 0.002 | 0.012 | 0.018 | 0.144 | 0.007 | 0.729 | 0.000 | 0.000 | 0.008 | 0.003 | 0.056 |
| Ceder |     | 0.092 | 0.023 | 0.045 | 0.155 | 0.026 | 0.193 | 0.014 | 0.311 | 0.139 | 0.061 | 0.013 | 0.027 | 0.179 | 0.045 | 0.259 | 0.006 | 0.281 |
| Charm |     | 0.234 | 0.026 | 0.129 | 0.041 | 0.003 | 0.126 | 0.003 | 0.253 | 0.184 | 0.117 | 0.013 | 0.059 | 0.068 | 0.009 | 0.262 | 0.002 | 0.270 |
| Amber |     | 0.035 | 0.003 | 0.014 | 0.122 | 0.013 | 0.257 | 0.005 | 0.310 | 0.241 | 0.013 | 0.001 | 0.004 | 0.152 | 0.023 | 0.380 | 0.002 | 0.254 |
| Hf    |     | 0.124 | 0.012 | 0.202 | 0.002 | 0.001 | 0.062 | 0.004 | 0.355 | 0.238 | 0.047 | 0.006 | 0.084 | 0.006 | 0.003 | 0.175 | 0.003 | 0.443 |
| Dft   |     | 0.107 | 0.018 | 0.154 | 0.005 | 0.002 | 0.072 | 0.010 | 0.410 | 0.223 | 0.045 | 0.009 | 0.070 | 0.008 | 0.004 | 0.146 | 0.007 | 0.493 |
| Mp2   |     | 0.144 | 0.023 | 0.109 | 0.003 | 0.001 | 0.024 | 0.009 | 0.545 | 0.142 | 0.068 | 0.013 | 0.052 | 0.007 | 0.003 | 0.075 | 0.006 | 0.586 |
| Dun   | -40 | 0.252 | 0.005 | 0.672 | 0.000 | 0.000 | 0.004 | 0.000 | 0.046 | 0.020 | 0.185 | 0.005 | 0.529 | 0.000 | 0.001 | 0.070 | 0.001 | 0.109 |

| TT    | -30   |       |       |       |       |       |       |       |       | -20   |       |       |       |       |       |       |       |       |
|-------|-------|-------|-------|-------|-------|-------|-------|-------|-------|-------|-------|-------|-------|-------|-------|-------|-------|-------|
|       | MM    | MP    | MT    | PM    | PP    | PT    | TM    | TP    | TT    | MM    | MP    | MT    | PM    | PP    | PT    | TM    | TP    | TT    |
| 0.134 | 0.076 | 0.016 | 0.031 | 0.160 | 0.078 | 0.250 | 0.003 | 0.274 | 0.112 | 0.045 | 0.009 | 0.018 | 0.173 | 0.170 | 0.301 | 0.001 | 0.193 | 0.088 |
| 0.194 | 0.051 | 0.005 | 0.028 | 0.116 | 0.020 | 0.462 | 0.001 | 0.169 | 0.148 | 0.014 | 0.001 | 0.007 | 0.135 | 0.038 | 0.638 | 0.000 | 0.090 | 0.077 |
| 0.207 | 0.010 | 0.001 | 0.003 | 0.165 | 0.028 | 0.459 | 0.001 | 0.204 | 0.129 | 0.003 | 0.000 | 0.001 | 0.169 | 0.069 | 0.591 | 0.000 | 0.103 | 0.064 |
| 0.193 | 0.029 | 0.004 | 0.053 | 0.013 | 0.009 | 0.315 | 0.001 | 0.394 | 0.182 | 0.008 | 0.001 | 0.013 | 0.019 | 0.017 | 0.519 | 0.001 | 0.254 | 0.170 |
| 0.185 | 0.033 | 0.006 | 0.058 | 0.016 | 0.010 | 0.240 | 0.004 | 0.458 | 0.174 | 0.013 | 0.002 | 0.022 | 0.024 | 0.025 | 0.401 | 0.002 | 0.335 | 0.177 |
| 0.143 | 0.033 | 0.007 | 0.027 | 0.017 | 0.009 | 0.133 | 0.003 | 0.601 | 0.169 | 0.012 | 0.002 | 0.009 | 0.030 | 0.020 | 0.260 | 0.001 | 0.515 | 0.152 |
| 0.025 | 0.137 | 0.011 | 0.521 | 0.000 | 0.007 | 0.077 | 0.005 | 0.120 | 0.122 | 0.039 | 0.004 | 0.130 | 0.000 | 0.010 | 0.345 | 0.005 | 0.207 | 0.261 |
| 0.133 | 0.056 | 0.013 | 0.029 | 0.159 | 0.081 | 0.264 | 0.003 | 0.282 | 0.112 | 0.033 | 0.008 | 0.015 | 0.171 | 0.179 | 0.315 | 0.001 | 0.189 | 0.089 |
| 0.186 | 0.041 | 0.004 | 0.021 | 0.115 | 0.025 | 0.505 | 0.000 | 0.158 | 0.130 | 0.009 | 0.001 | 0.004 | 0.133 | 0.041 | 0.680 | 0.000 | 0.062 | 0.069 |
| 0.199 | 0.008 | 0.001 | 0.002 | 0.166 | 0.031 | 0.485 | 0.001 | 0.190 | 0.116 | 0.002 | 0.000 | 0.000 | 0.165 | 0.086 | 0.599 | 0.000 | 0.089 | 0.058 |
| 0.216 | 0.024 | 0.003 | 0.042 | 0.013 | 0.009 | 0.322 | 0.002 | 0.388 | 0.197 | 0.006 | 0.001 | 0.010 | 0.018 | 0.018 | 0.530 | 0.001 | 0.250 | 0.168 |
| 0.200 | 0.030 | 0.006 | 0.050 | 0.017 | 0.011 | 0.249 | 0.004 | 0.452 | 0.182 | 0.011 | 0.002 | 0.018 | 0.025 | 0.030 | 0.412 | 0.002 | 0.318 | 0.183 |
| 0.159 | 0.030 | 0.006 | 0.023 | 0.016 | 0.010 | 0.141 | 0.003 | 0.602 | 0.169 | 0.011 | 0.002 | 0.008 | 0.035 | 0.022 | 0.289 | 0.001 | 0.474 | 0.158 |
| 0.029 | 0.119 | 0.007 | 0.496 | 0.000 | 0.007 | 0.068 | 0.006 | 0.146 | 0.151 | 0.045 | 0.005 | 0.121 | 0.000 | 0.010 | 0.250 | 0.006 | 0.232 | 0.330 |
| 0.123 | 0.044 | 0.010 | 0.021 | 0.165 | 0.097 | 0.285 | 0.003 | 0.267 | 0.108 | 0.027 | 0.006 | 0.012 | 0.187 | 0.199 | 0.315 | 0.001 | 0.180 | 0.073 |
| 0.204 | 0.052 | 0.004 | 0.028 | 0.093 | 0.022 | 0.408 | 0.001 | 0.224 | 0.168 | 0.038 | 0.013 | 0.003 | 0.393 | 0.164 | 0.275 | 0.000 | 0.068 | 0.047 |
| 0.187 | 0.005 | 0.000 | 0.002 | 0.167 | 0.038 | 0.514 | 0.001 | 0.171 | 0.101 | 0.001 | 0.000 | 0.000 | 0.165 | 0.106 | 0.605 | 0.000 | 0.072 | 0.051 |
| 0.226 | 0.019 | 0.002 | 0.033 | 0.012 | 0.009 | 0.345 | 0.001 | 0.365 | 0.213 | 0.003 | 0.000 | 0.006 | 0.017 | 0.018 | 0.547 | 0.000 | 0.253 | 0.156 |
| 0.213 | 0.023 | 0.005 | 0.038 | 0.016 | 0.011 | 0.258 | 0.003 | 0.454 | 0.192 | 0.006 | 0.001 | 0.010 | 0.025 | 0.031 | 0.452 | 0.001 | 0.291 | 0.183 |
| 0.179 | 0.029 | 0.005 | 0.021 | 0.016 | 0.011 | 0.158 | 0.003 | 0.600 | 0.157 | 0.008 | 0.001 | 0.005 | 0.049 | 0.028 | 0.338 | 0.001 | 0.407 | 0.164 |
| 0.053 | 0.097 | 0.003 | 0.387 | 0.000 | 0.006 | 0.059 | 0.006 | 0.218 | 0.225 | 0.066 | 0.001 | 0.125 | 0.000 | 0.021 | 0.150 | 0.002 | 0.309 | 0.326 |
| 0.129 | 0.040 | 0.009 | 0.018 | 0.188 | 0.125 | 0.280 | 0.003 | 0.234 | 0.102 | 0.019 | 0.004 | 0.008 | 0.187 | 0.243 | 0.316 | 0.001 | 0.158 | 0.063 |
| 0.200 | 0.035 | 0.004 | 0.019 | 0.101 | 0.024 | 0.452 | 0.001 | 0.212 | 0.151 | 0.011 | 0.001 | 0.004 | 0.128 | 0.041 | 0.611 | 0.000 | 0.107 | 0.097 |
| 0.170 | 0.003 | 0.000 | 0.001 | 0.166 | 0.053 | 0.541 | 0.001 | 0.144 | 0.091 | 0.001 | 0.000 | 0.000 | 0.185 | 0.137 | 0.588 | 0.000 | 0.052 | 0.037 |
| 0.232 | 0.010 | 0.001 | 0.019 | 0.013 | 0.009 | 0.377 | 0.001 | 0.339 | 0.230 | 0.001 | 0.000 | 0.002 | 0.017 | 0.019 | 0.551 | 0.000 | 0.261 | 0.148 |
| 0.218 | 0.012 | 0.003 | 0.021 | 0.016 | 0.012 | 0.290 | 0.003 | 0.434 | 0.209 | 0.002 | 0.000 | 0.003 | 0.027 | 0.033 | 0.448 | 0.001 | 0.306 | 0.180 |
| 0.189 | 0.019 | 0.003 | 0.014 | 0.019 | 0.012 | 0.176 | 0.002 | 0.592 | 0.163 | 0.002 | 0.000 | 0.002 | 0.054 | 0.028 | 0.336 | 0.001 | 0.417 | 0.159 |
| 0.100 | 0.059 | 0.005 | 0.305 | 0.001 | 0.009 | 0.262 | 0.003 | 0.136 | 0.221 | 0.037 | 0.003 | 0.145 | 0.003 | 0.026 | 0.549 | 0.003 | 0.071 | 0.164 |

Rotamer probabilities for isoleucine beta strand region by phi (vertical) and psi (horizontal) see methods for rotamer nomenclature

|       |      | 110   |       |       |       |       |       |       |       | 120   |       |       |       |       |       |       |       |       |
|-------|------|-------|-------|-------|-------|-------|-------|-------|-------|-------|-------|-------|-------|-------|-------|-------|-------|-------|
|       |      | MM    | MP    | MT    | PM    | PP    | PT    | TM    | TP    | TT    | MM    | MP    | MT    | PM    | PP    | PT    | TM    | TP    |
| Ceder |      | 0.261 | 0.043 | 0.112 | 0.081 | 0.013 | 0.110 | 0.033 | 0.256 | 0.091 | 0.238 | 0.037 | 0.093 | 0.097 | 0.016 | 0.130 | 0.028 | 0.266 |
| Charm |      | 0.543 | 0.019 | 0.292 | 0.001 | 0.001 | 0.033 | 0.001 | 0.083 | 0.027 | 0.464 | 0.019 | 0.300 | 0.002 | 0.001 | 0.047 | 0.002 | 0.136 |
| Amber |      | 0.332 | 0.020 | 0.184 | 0.021 | 0.007 | 0.149 | 0.005 | 0.216 | 0.066 | 0.277 | 0.016 | 0.154 | 0.030 | 0.007 | 0.172 | 0.006 | 0.252 |
| Hf    |      | 0.341 | 0.025 | 0.527 | 0.001 | 0.000 | 0.024 | 0.001 | 0.038 | 0.042 | 0.341 | 0.022 | 0.492 | 0.001 | 0.001 | 0.041 | 0.002 | 0.043 |
| Dft   |      | 0.369 | 0.034 | 0.436 | 0.002 | 0.001 | 0.038 | 0.003 | 0.061 | 0.057 | 0.365 | 0.028 | 0.415 | 0.003 | 0.002 | 0.053 | 0.003 | 0.064 |
| Mp2   |      | 0.623 | 0.024 | 0.267 | 0.001 | 0.000 | 0.011 | 0.002 | 0.046 | 0.026 | 0.602 | 0.024 | 0.256 | 0.002 | 0.001 | 0.018 | 0.002 | 0.058 |
| Dun   | -110 | 0.234 | 0.029 | 0.724 | 0.000 | 0.000 | 0.002 | 0.000 | 0.003 | 0.009 | 0.218 | 0.032 | 0.729 | 0.000 | 0.001 | 0.001 | 0.000 | 0.004 |
| Ceder |      | 0.245 | 0.028 | 0.116 | 0.088 | 0.016 | 0.123 | 0.034 | 0.257 | 0.093 | 0.210 | 0.024 | 0.098 | 0.108 | 0.019 | 0.136 | 0.028 | 0.282 |
| Charm |      | 0.473 | 0.019 | 0.317 | 0.001 | 0.001 | 0.035 | 0.002 | 0.115 | 0.037 | 0.434 | 0.016 | 0.288 | 0.001 | 0.001 | 0.058 | 0.003 | 0.138 |
| Amber |      | 0.272 | 0.018 | 0.194 | 0.022 | 0.009 | 0.163 | 0.006 | 0.244 | 0.074 | 0.229 | 0.013 | 0.158 | 0.031 | 0.008 | 0.183 | 0.007 | 0.275 |
| Hf    |      | 0.327 | 0.026 | 0.530 | 0.001 | 0.000 | 0.022 | 0.001 | 0.042 | 0.050 | 0.320 | 0.022 | 0.496 | 0.001 | 0.001 | 0.040 | 0.002 | 0.048 |
| Dft   |      | 0.382 | 0.037 | 0.414 | 0.002 | 0.001 | 0.035 | 0.003 | 0.064 | 0.062 | 0.380 | 0.033 | 0.385 | 0.003 | 0.002 | 0.050 | 0.004 | 0.068 |
| Mp2   |      | 0.618 | 0.027 | 0.269 | 0.001 | 0.000 | 0.011 | 0.002 | 0.044 | 0.028 | 0.604 | 0.024 | 0.254 | 0.002 | 0.001 | 0.017 | 0.003 | 0.055 |
| Dun   | -120 | 0.152 | 0.034 | 0.792 | 0.000 | 0.000 | 0.000 | 0.000 | 0.004 | 0.018 | 0.134 | 0.031 | 0.799 | 0.000 | 0.001 | 0.001 | 0.000 | 0.007 |
| Ceder |      | 0.180 | 0.021 | 0.097 | 0.098 | 0.019 | 0.139 | 0.038 | 0.301 | 0.106 | 0.148 | 0.018 | 0.097 | 0.110 | 0.024 | 0.158 | 0.031 | 0.304 |
| Charm |      | 0.335 | 0.022 | 0.324 | 0.001 | 0.001 | 0.041 | 0.003 | 0.207 | 0.065 | 0.274 | 0.017 | 0.269 | 0.001 | 0.001 | 0.048 | 0.005 | 0.290 |
| Amber |      | 0.177 | 0.015 | 0.206 | 0.021 | 0.010 | 0.171 | 0.007 | 0.302 | 0.090 | 0.146 | 0.011 | 0.161 | 0.029 | 0.009 | 0.189 | 0.008 | 0.332 |
| Hf    |      | 0.300 | 0.028 | 0.518 | 0.001 | 0.000 | 0.020 | 0.002 | 0.057 | 0.074 | 0.299 | 0.023 | 0.474 | 0.001 | 0.001 | 0.037 | 0.003 | 0.065 |
| Dft   |      | 0.358 | 0.042 | 0.394 | 0.002 | 0.001 | 0.035 | 0.004 | 0.078 | 0.086 | 0.328 | 0.038 | 0.369 | 0.003 | 0.002 | 0.052 | 0.005 | 0.087 |
| Mp2   |      | 0.562 | 0.035 | 0.297 | 0.001 | 0.000 | 0.011 | 0.003 | 0.053 | 0.037 | 0.534 | 0.031 | 0.286 | 0.002 | 0.001 | 0.018 | 0.004 | 0.069 |
| Dun   | -130 | 0.102 | 0.026 | 0.839 | 0.000 | 0.000 | 0.001 | 0.000 | 0.006 | 0.025 | 0.098 | 0.020 | 0.818 | 0.000 | 0.000 | 0.000 | 0.000 | 0.013 |
| Ceder |      | 0.115 | 0.011 | 0.077 | 0.111 | 0.022 | 0.155 | 0.042 | 0.352 | 0.116 | 0.101 | 0.009 | 0.067 | 0.118 | 0.026 | 0.167 | 0.034 | 0.352 |
| Charm |      | 0.166 | 0.013 | 0.271 | 0.001 | 0.001 | 0.046 | 0.006 | 0.378 | 0.117 | 0.121 | 0.009 | 0.196 | 0.001 | 0.001 | 0.050 | 0.009 | 0.464 |
| Amber |      | 0.122 | 0.010 | 0.169 | 0.015 | 0.011 | 0.141 | 0.009 | 0.404 | 0.119 | 0.097 | 0.007 | 0.124 | 0.020 | 0.009 | 0.156 | 0.010 | 0.433 |
| Hf    |      | 0.267 | 0.024 | 0.452 | 0.000 | 0.000 | 0.018 | 0.004 | 0.098 | 0.136 | 0.255 | 0.019 | 0.391 | 0.001 | 0.000 | 0.032 | 0.005 | 0.111 |
| Dft   |      | 0.310 | 0.043 | 0.374 | 0.001 | 0.001 | 0.032 | 0.007 | 0.106 | 0.125 | 0.283 | 0.037 | 0.325 | 0.002 | 0.002 | 0.047 | 0.008 | 0.126 |
| Mp2   |      | 0.510 | 0.039 | 0.295 | 0.001 | 0.000 | 0.010 | 0.005 | 0.079 | 0.061 | 0.484 | 0.033 | 0.265 | 0.002 | 0.001 | 0.017 | 0.006 | 0.102 |
| Dun   | -140 | 0.081 | 0.024 | 0.833 | 0.000 | 0.000 | 0.001 | 0.000 | 0.016 | 0.044 | 0.095 | 0.015 | 0.748 | 0.000 | 0.000 | 0.002 | 0.001 | 0.027 |

| TT    | 130   |       |       |       |       |       |       |       |       | 140   |       |       |       |       |       |       |       |       |
|-------|-------|-------|-------|-------|-------|-------|-------|-------|-------|-------|-------|-------|-------|-------|-------|-------|-------|-------|
|       | MM    | MP    | MT    | PM    | PP    | PT    | TM    | TP    | TT    | MM    | MP    | MT    | PM    | PP    | PT    | TM    | TP    | TT    |
| 0.095 | 0.200 | 0.033 | 0.086 | 0.117 | 0.022 | 0.170 | 0.015 | 0.255 | 0.104 | 0.155 | 0.025 | 0.071 | 0.129 | 0.043 | 0.212 | 0.007 | 0.255 | 0.103 |
| 0.029 | 0.394 | 0.012 | 0.201 | 0.004 | 0.002 | 0.116 | 0.002 | 0.200 | 0.070 | 0.217 | 0.006 | 0.127 | 0.007 | 0.007 | 0.194 | 0.002 | 0.317 | 0.123 |
| 0.087 | 0.206 | 0.010 | 0.105 | 0.041 | 0.009 | 0.239 | 0.005 | 0.272 | 0.113 | 0.119 | 0.005 | 0.053 | 0.053 | 0.018 | 0.351 | 0.003 | 0.281 | 0.118 |
| 0.057 | 0.312 | 0.018 | 0.409 | 0.003 | 0.003 | 0.103 | 0.001 | 0.057 | 0.094 | 0.208 | 0.009 | 0.249 | 0.007 | 0.011 | 0.291 | 0.001 | 0.084 | 0.139 |
| 0.069 | 0.322 | 0.026 | 0.337 | 0.005 | 0.006 | 0.111 | 0.003 | 0.081 | 0.108 | 0.237 | 0.017 | 0.232 | 0.009 | 0.014 | 0.232 | 0.002 | 0.106 | 0.150 |
| 0.038 | 0.559 | 0.028 | 0.220 | 0.004 | 0.003 | 0.045 | 0.003 | 0.077 | 0.062 | 0.469 | 0.022 | 0.163 | 0.010 | 0.011 | 0.130 | 0.002 | 0.100 | 0.093 |
| 0.014 | 0.229 | 0.027 | 0.697 | 0.000 | 0.002 | 0.009 | 0.000 | 0.007 | 0.029 | 0.215 | 0.022 | 0.607 | 0.000 | 0.005 | 0.068 | 0.002 | 0.015 | 0.066 |
| 0.094 | 0.178 | 0.020 | 0.085 | 0.118 | 0.027 | 0.187 | 0.015 | 0.269 | 0.102 | 0.146 | 0.015 | 0.067 | 0.132 | 0.050 | 0.235 | 0.007 | 0.244 | 0.102 |
| 0.060 | 0.329 | 0.011 | 0.164 | 0.003 | 0.002 | 0.119 | 0.004 | 0.261 | 0.107 | 0.171 | 0.006 | 0.104 | 0.005 | 0.006 | 0.173 | 0.003 | 0.395 | 0.137 |
| 0.096 | 0.163 | 0.009 | 0.107 | 0.042 | 0.010 | 0.249 | 0.005 | 0.292 | 0.123 | 0.089 | 0.004 | 0.052 | 0.052 | 0.019 | 0.356 | 0.003 | 0.301 | 0.123 |
| 0.070 | 0.279 | 0.017 | 0.410 | 0.003 | 0.003 | 0.101 | 0.002 | 0.065 | 0.119 | 0.172 | 0.010 | 0.220 | 0.009 | 0.012 | 0.294 | 0.002 | 0.101 | 0.181 |
| 0.076 | 0.325 | 0.027 | 0.331 | 0.005 | 0.006 | 0.104 | 0.004 | 0.079 | 0.120 | 0.217 | 0.018 | 0.221 | 0.010 | 0.015 | 0.221 | 0.002 | 0.118 | 0.179 |
| 0.041 | 0.556 | 0.019 | 0.227 | 0.005 | 0.004 | 0.046 | 0.003 | 0.075 | 0.066 | 0.422 | 0.014 | 0.169 | 0.013 | 0.015 | 0.145 | 0.003 | 0.107 | 0.110 |
| 0.026 | 0.156 | 0.026 | 0.745 | 0.000 | 0.003 | 0.015 | 0.000 | 0.009 | 0.046 | 0.166 | 0.022 | 0.616 | 0.000 | 0.005 | 0.092 | 0.000 | 0.013 | 0.085 |
| 0.110 | 0.125 | 0.015 | 0.079 | 0.124 | 0.032 | 0.197 | 0.016 | 0.292 | 0.120 | 0.100 | 0.010 | 0.057 | 0.141 | 0.059 | 0.247 | 0.008 | 0.266 | 0.114 |
| 0.095 | 0.187 | 0.011 | 0.176 | 0.002 | 0.002 | 0.114 | 0.006 | 0.361 | 0.140 | 0.078 | 0.005 | 0.072 | 0.004 | 0.005 | 0.182 | 0.004 | 0.487 | 0.163 |
| 0.115 | 0.103 | 0.007 | 0.104 | 0.039 | 0.010 | 0.239 | 0.006 | 0.347 | 0.145 | 0.055 | 0.003 | 0.048 | 0.048 | 0.019 | 0.328 | 0.004 | 0.353 | 0.142 |
| 0.098 | 0.261 | 0.017 | 0.368 | 0.003 | 0.003 | 0.093 | 0.002 | 0.085 | 0.169 | 0.150 | 0.009 | 0.185 | 0.008 | 0.011 | 0.245 | 0.002 | 0.133 | 0.258 |
| 0.116 | 0.281 | 0.030 | 0.312 | 0.005 | 0.006 | 0.097 | 0.005 | 0.104 | 0.160 | 0.189 | 0.019 | 0.202 | 0.010 | 0.015 | 0.188 | 0.003 | 0.147 | 0.228 |
| 0.056 | 0.472 | 0.027 | 0.254 | 0.005 | 0.004 | 0.049 | 0.004 | 0.093 | 0.092 | 0.348 | 0.018 | 0.171 | 0.014 | 0.017 | 0.142 | 0.003 | 0.135 | 0.151 |
| 0.050 | 0.103 | 0.018 | 0.744 | 0.000 | 0.001 | 0.017 | 0.000 | 0.013 | 0.103 | 0.093 | 0.017 | 0.581 | 0.002 | 0.004 | 0.118 | 0.000 | 0.019 | 0.166 |
| 0.126 | 0.089 | 0.008 | 0.053 | 0.131 | 0.037 | 0.203 | 0.019 | 0.329 | 0.132 | 0.068 | 0.005 | 0.040 | 0.154 | 0.058 | 0.250 | 0.008 | 0.294 | 0.124 |
| 0.149 | 0.070 | 0.005 | 0.103 | 0.002 | 0.001 | 0.078 | 0.008 | 0.530 | 0.204 | 0.027 | 0.002 | 0.038 | 0.003 | 0.003 | 0.114 | 0.005 | 0.622 | 0.187 |
| 0.144 | 0.064 | 0.004 | 0.075 | 0.027 | 0.010 | 0.194 | 0.007 | 0.442 | 0.178 | 0.032 | 0.002 | 0.032 | 0.034 | 0.013 | 0.249 | 0.004 | 0.453 | 0.179 |
| 0.186 | 0.194 | 0.012 | 0.262 | 0.002 | 0.002 | 0.075 | 0.004 | 0.144 | 0.303 | 0.090 | 0.005 | 0.105 | 0.005 | 0.006 | 0.167 | 0.003 | 0.203 | 0.415 |
| 0.170 | 0.214 | 0.026 | 0.234 | 0.004 | 0.004 | 0.085 | 0.007 | 0.149 | 0.276 | 0.120 | 0.013 | 0.135 | 0.007 | 0.011 | 0.138 | 0.004 | 0.212 | 0.359 |
| 0.091 | 0.423 | 0.025 | 0.214 | 0.004 | 0.003 | 0.038 | 0.006 | 0.138 | 0.148 | 0.270 | 0.015 | 0.126 | 0.011 | 0.012 | 0.102 | 0.005 | 0.208 | 0.251 |
| 0.113 | 0.088 | 0.012 | 0.636 | 0.000 | 0.000 | 0.012 | 0.001 | 0.031 | 0.221 | 0.062 | 0.010 | 0.433 | 0.003 | 0.004 | 0.107 | 0.001 | 0.053 | 0.327 |

| 150   |       |       |       |       |       |       |       |       | 160   |       |       |       |       |       |       |       |       |
|-------|-------|-------|-------|-------|-------|-------|-------|-------|-------|-------|-------|-------|-------|-------|-------|-------|-------|
| MM    | MP    | MT    | PM    | PP    | PT    | TM    | TP    | TT    | MM    | MP    | MT    | PM    | PP    | PT    | TM    | TP    | TT    |
| 0.122 | 0.015 | 0.048 | 0.146 | 0.090 | 0.257 | 0.003 | 0.223 | 0.097 | 0.069 | 0.007 | 0.023 | 0.164 | 0.161 | 0.332 | 0.001 | 0.172 | 0.071 |
| 0.076 | 0.001 | 0.038 | 0.010 | 0.020 | 0.399 | 0.001 | 0.350 | 0.104 | 0.023 | 0.000 | 0.006 | 0.021 | 0.053 | 0.566 | 0.000 | 0.259 | 0.070 |
| 0.050 | 0.002 | 0.018 | 0.062 | 0.037 | 0.497 | 0.001 | 0.248 | 0.086 | 0.015 | 0.000 | 0.004 | 0.068 | 0.093 | 0.615 | 0.000 | 0.155 | 0.051 |
| 0.065 | 0.003 | 0.071 | 0.014 | 0.028 | 0.620 | 0.000 | 0.078 | 0.121 | 0.011 | 0.000 | 0.011 | 0.017 | 0.053 | 0.805 | 0.000 | 0.039 | 0.063 |
| 0.132 | 0.008 | 0.115 | 0.016 | 0.040 | 0.398 | 0.001 | 0.123 | 0.167 | 0.050 | 0.003 | 0.040 | 0.023 | 0.083 | 0.574 | 0.000 | 0.099 | 0.127 |
| 0.258 | 0.008 | 0.075 | 0.030 | 0.038 | 0.329 | 0.001 | 0.141 | 0.120 | 0.081 | 0.002 | 0.020 | 0.057 | 0.101 | 0.548 | 0.000 | 0.108 | 0.083 |
| 0.091 | 0.012 | 0.293 | 0.001 | 0.017 | 0.467 | 0.006 | 0.018 | 0.095 | 0.015 | 0.000 | 0.051 | 0.001 | 0.022 | 0.874 | 0.000 | 0.006 | 0.031 |
| 0.102 | 0.010 | 0.043 | 0.157 | 0.095 | 0.275 | 0.002 | 0.220 | 0.095 | 0.057 | 0.004 | 0.020 | 0.181 | 0.172 | 0.332 | 0.001 | 0.165 | 0.068 |
| 0.056 | 0.002 | 0.030 | 0.009 | 0.015 | 0.360 | 0.001 | 0.427 | 0.099 | 0.015 | 0.000 | 0.008 | 0.015 | 0.052 | 0.478 | 0.000 | 0.351 | 0.080 |
| 0.036 | 0.001 | 0.017 | 0.060 | 0.039 | 0.494 | 0.001 | 0.262 | 0.090 | 0.010 | 0.000 | 0.004 | 0.065 | 0.095 | 0.607 | 0.000 | 0.165 | 0.053 |
| 0.056 | 0.003 | 0.064 | 0.015 | 0.029 | 0.592 | 0.001 | 0.090 | 0.150 | 0.009 | 0.000 | 0.009 | 0.019 | 0.053 | 0.781 | 0.000 | 0.048 | 0.081 |
| 0.104 | 0.008 | 0.108 | 0.019 | 0.039 | 0.399 | 0.001 | 0.135 | 0.186 | 0.042 | 0.003 | 0.035 | 0.027 | 0.075 | 0.573 | 0.000 | 0.104 | 0.142 |
| 0.176 | 0.007 | 0.079 | 0.040 | 0.046 | 0.360 | 0.001 | 0.150 | 0.142 | 0.047 | 0.002 | 0.019 | 0.069 | 0.111 | 0.555 | 0.000 | 0.108 | 0.090 |
| 0.064 | 0.005 | 0.234 | 0.001 | 0.024 | 0.564 | 0.001 | 0.019 | 0.088 | 0.003 | 0.000 | 0.025 | 0.001 | 0.043 | 0.898 | 0.000 | 0.006 | 0.022 |
| 0.074 | 0.006 | 0.038 | 0.160 | 0.112 | 0.295 | 0.003 | 0.210 | 0.103 | 0.037 | 0.003 | 0.017 | 0.194 | 0.190 | 0.323 | 0.001 | 0.162 | 0.073 |
| 0.023 | 0.001 | 0.021 | 0.006 | 0.015 | 0.292 | 0.002 | 0.505 | 0.134 | 0.006 | 0.000 | 0.006 | 0.010 | 0.045 | 0.419 | 0.001 | 0.430 | 0.085 |
| 0.023 | 0.001 | 0.015 | 0.055 | 0.039 | 0.457 | 0.001 | 0.307 | 0.103 | 0.007 | 0.000 | 0.003 | 0.062 | 0.083 | 0.579 | 0.000 | 0.202 | 0.064 |
| 0.042 | 0.002 | 0.046 | 0.015 | 0.026 | 0.511 | 0.001 | 0.129 | 0.228 | 0.006 | 0.000 | 0.007 | 0.019 | 0.043 | 0.708 | 0.000 | 0.076 | 0.140 |
| 0.087 | 0.008 | 0.090 | 0.017 | 0.036 | 0.343 | 0.002 | 0.165 | 0.252 | 0.028 | 0.003 | 0.027 | 0.025 | 0.064 | 0.509 | 0.001 | 0.134 | 0.208 |
| 0.147 | 0.007 | 0.067 | 0.039 | 0.044 | 0.328 | 0.002 | 0.181 | 0.186 | 0.033 | 0.002 | 0.015 | 0.071 | 0.097 | 0.520 | 0.000 | 0.138 | 0.124 |
| 0.041 | 0.001 | 0.205 | 0.006 | 0.018 | 0.571 | 0.001 | 0.028 | 0.129 | 0.005 | 0.000 | 0.018 | 0.004 | 0.046 | 0.894 | 0.000 | 0.008 | 0.024 |
| 0.050 | 0.003 | 0.024 | 0.166 | 0.108 | 0.274 | 0.003 | 0.256 | 0.116 | 0.024 | 0.001 | 0.011 | 0.177 | 0.181 | 0.324 | 0.001 | 0.200 | 0.081 |
| 0.008 | 0.001 | 0.010 | 0.004 | 0.009 | 0.183 | 0.002 | 0.626 | 0.158 | 0.002 | 0.000 | 0.002 | 0.005 | 0.027 | 0.304 | 0.001 | 0.545 | 0.114 |
| 0.013 | 0.001 | 0.009 | 0.042 | 0.031 | 0.342 | 0.002 | 0.423 | 0.139 | 0.004 | 0.000 | 0.002 | 0.051 | 0.066 | 0.476 | 0.000 | 0.307 | 0.094 |
| 0.023 | 0.001 | 0.023 | 0.011 | 0.015 | 0.314 | 0.001 | 0.215 | 0.397 | 0.003 | 0.000 | 0.004 | 0.015 | 0.024 | 0.488 | 0.000 | 0.156 | 0.309 |
| 0.050 | 0.006 | 0.058 | 0.012 | 0.022 | 0.234 | 0.002 | 0.232 | 0.384 | 0.014 | 0.002 | 0.017 | 0.017 | 0.041 | 0.359 | 0.001 | 0.215 | 0.334 |
| 0.094 | 0.005 | 0.045 | 0.025 | 0.029 | 0.222 | 0.002 | 0.276 | 0.302 | 0.019 | 0.001 | 0.010 | 0.049 | 0.058 | 0.380 | 0.001 | 0.245 | 0.235 |
| 0.023 | 0.001 | 0.150 | 0.008 | 0.010 | 0.453 | 0.001 | 0.070 | 0.284 | 0.007 | 0.000 | 0.019 | 0.009 | 0.033 | 0.819 | 0.001 | 0.026 | 0.086 |

Rotamer probabilities for leucine alpha helix region by phi (vertical) and psi (horizontal) see methods for rotamer nomenclature

|       |     | -50   |       |       |       |       |       |       |       | -40   |       |       |       |       |       |       |       |       |
|-------|-----|-------|-------|-------|-------|-------|-------|-------|-------|-------|-------|-------|-------|-------|-------|-------|-------|-------|
|       |     | MM    | MP    | MT    | PM    | PP    | PT    | TM    | TP    | TT    | MM    | MP    | MT    | PM    | PP    | PT    | TM    | TP    |
| Ceder |     | 0.080 | 0.098 | 0.328 | 0.003 | 0.008 | 0.088 | 0.062 | 0.298 | 0.034 | 0.079 | 0.096 | 0.362 | 0.006 | 0.015 | 0.126 | 0.040 | 0.254 |
| Charm |     | 0.040 | 0.040 | 0.469 | 0.000 | 0.001 | 0.031 | 0.014 | 0.390 | 0.014 | 0.045 | 0.041 | 0.509 | 0.001 | 0.005 | 0.064 | 0.007 | 0.319 |
| Amber |     | 0.006 | 0.012 | 0.049 | 0.000 | 0.000 | 0.007 | 0.027 | 0.875 | 0.025 | 0.007 | 0.014 | 0.061 | 0.000 | 0.001 | 0.017 | 0.013 | 0.870 |
| Hf    |     | 0.008 | 0.041 | 0.308 | 0.000 | 0.000 | 0.001 | 0.004 | 0.623 | 0.015 | 0.010 | 0.051 | 0.415 | 0.000 | 0.001 | 0.004 | 0.003 | 0.505 |
| Dft   |     | 0.013 | 0.054 | 0.342 | 0.000 | 0.001 | 0.003 | 0.006 | 0.559 | 0.023 | 0.016 | 0.065 | 0.426 | 0.000 | 0.003 | 0.007 | 0.004 | 0.460 |
| Mp2   |     | 0.008 | 0.028 | 0.145 | 0.000 | 0.001 | 0.004 | 0.017 | 0.766 | 0.030 | 0.011 | 0.037 | 0.226 | 0.000 | 0.007 | 0.017 | 0.011 | 0.663 |
| Dun   | -70 | 0.004 | 0.018 | 0.487 | 0.000 | 0.000 | 0.000 | 0.006 | 0.455 | 0.030 | 0.007 | 0.021 | 0.605 | 0.000 | 0.002 | 0.000 | 0.003 | 0.341 |
| Ceder |     | 0.080 | 0.092 | 0.324 | 0.003 | 0.010 | 0.100 | 0.055 | 0.303 | 0.033 | 0.074 | 0.096 | 0.356 | 0.007 | 0.018 | 0.134 | 0.036 | 0.258 |
| Charm |     | 0.045 | 0.042 | 0.464 | 0.000 | 0.001 | 0.037 | 0.012 | 0.385 | 0.012 | 0.052 | 0.045 | 0.477 | 0.001 | 0.006 | 0.078 | 0.006 | 0.327 |
| Amber |     | 0.005 | 0.011 | 0.042 | 0.000 | 0.000 | 0.008 | 0.025 | 0.883 | 0.024 | 0.007 | 0.013 | 0.054 | 0.000 | 0.001 | 0.023 | 0.012 | 0.873 |
| Hf    |     | 0.007 | 0.040 | 0.290 | 0.000 | 0.000 | 0.001 | 0.004 | 0.640 | 0.017 | 0.010 | 0.050 | 0.413 | 0.000 | 0.001 | 0.004 | 0.003 | 0.507 |
| Dft   |     | 0.013 | 0.055 | 0.335 | 0.000 | 0.001 | 0.003 | 0.007 | 0.561 | 0.025 | 0.016 | 0.065 | 0.444 | 0.000 | 0.003 | 0.008 | 0.005 | 0.442 |
| Mp2   |     | 0.007 | 0.024 | 0.144 | 0.000 | 0.001 | 0.005 | 0.017 | 0.770 | 0.032 | 0.010 | 0.033 | 0.229 | 0.000 | 0.009 | 0.018 | 0.011 | 0.660 |
| Dun   | -60 | 0.004 | 0.015 | 0.458 | 0.000 | 0.000 | 0.000 | 0.007 | 0.474 | 0.042 | 0.006 | 0.020 | 0.570 | 0.000 | 0.001 | 0.000 | 0.005 | 0.372 |
| Ceder |     | 0.067 | 0.087 | 0.346 | 0.004 | 0.011 | 0.115 | 0.051 | 0.286 | 0.032 | 0.073 | 0.090 | 0.338 | 0.009 | 0.021 | 0.154 | 0.031 | 0.263 |
| Charm |     | 0.046 | 0.036 | 0.462 | 0.000 | 0.002 | 0.041 | 0.011 | 0.391 | 0.011 | 0.048 | 0.043 | 0.505 | 0.001 | 0.007 | 0.080 | 0.005 | 0.305 |
| Amber |     | 0.005 | 0.010 | 0.039 | 0.000 | 0.000 | 0.011 | 0.024 | 0.887 | 0.024 | 0.007 | 0.013 | 0.049 | 0.000 | 0.002 | 0.034 | 0.012 | 0.866 |
| Hf    |     | 0.007 | 0.039 | 0.284 | 0.000 | 0.000 | 0.001 | 0.005 | 0.645 | 0.019 | 0.010 | 0.047 | 0.434 | 0.000 | 0.002 | 0.005 | 0.003 | 0.488 |
| Dft   |     | 0.012 | 0.052 | 0.347 | 0.000 | 0.001 | 0.004 | 0.007 | 0.550 | 0.026 | 0.016 | 0.063 | 0.462 | 0.000 | 0.003 | 0.008 | 0.005 | 0.424 |
| Mp2   |     | 0.006 | 0.021 | 0.149 | 0.000 | 0.001 | 0.005 | 0.016 | 0.769 | 0.032 | 0.009 | 0.030 | 0.248 | 0.000 | 0.011 | 0.019 | 0.009 | 0.644 |
| Dun   | -50 | 0.005 | 0.013 | 0.378 | 0.000 | 0.000 | 0.000 | 0.007 | 0.533 | 0.064 | 0.004 | 0.019 | 0.478 | 0.000 | 0.001 | 0.001 | 0.007 | 0.446 |
| Ceder |     | 0.066 | 0.082 | 0.333 | 0.005 | 0.015 | 0.137 | 0.045 | 0.288 | 0.030 | 0.071 | 0.087 | 0.327 | 0.014 | 0.032 | 0.198 | 0.023 | 0.231 |
| Charm |     | 0.051 | 0.041 | 0.438 | 0.000 | 0.001 | 0.042 | 0.009 | 0.413 | 0.006 | 0.067 | 0.051 | 0.621 | 0.001 | 0.001 | 0.037 | 0.002 | 0.218 |
| Amber |     | 0.005 | 0.010 | 0.037 | 0.000 | 0.000 | 0.016 | 0.023 | 0.885 | 0.023 | 0.006 | 0.012 | 0.047 | 0.000 | 0.002 | 0.050 | 0.010 | 0.854 |
| Hf    |     | 0.007 | 0.036 | 0.291 | 0.000 | 0.000 | 0.002 | 0.005 | 0.640 | 0.020 | 0.009 | 0.043 | 0.448 | 0.000 | 0.002 | 0.005 | 0.003 | 0.477 |
| Dft   |     | 0.012 | 0.048 | 0.355 | 0.000 | 0.001 | 0.004 | 0.007 | 0.545 | 0.028 | 0.014 | 0.059 | 0.449 | 0.000 | 0.004 | 0.009 | 0.004 | 0.443 |
| Mp2   |     | 0.006 | 0.019 | 0.153 | 0.000 | 0.002 | 0.005 | 0.015 | 0.770 | 0.031 | 0.009 | 0.029 | 0.268 | 0.000 | 0.012 | 0.023 | 0.008 | 0.622 |
| Dun   | -40 | 0.011 | 0.004 | 0.170 | 0.000 | 0.000 | 0.000 | 0.014 | 0.718 | 0.083 | 0.002 | 0.007 | 0.308 | 0.000 | 0.018 | 0.002 | 0.016 | 0.604 |

| TT    | -30   |       |       |       |       |       |       |       |       | -20   |       |       |       |       |       |       |       |       |
|-------|-------|-------|-------|-------|-------|-------|-------|-------|-------|-------|-------|-------|-------|-------|-------|-------|-------|-------|
|       | MM    | MP    | MT    | PM    | PP    | PT    | TM    | TP    | TT    | MM    | MP    | MT    | PM    | PP    | PT    | TM    | TP    | TT    |
| 0.023 | 0.084 | 0.093 | 0.375 | 0.015 | 0.039 | 0.159 | 0.020 | 0.201 | 0.013 | 0.080 | 0.088 | 0.386 | 0.033 | 0.085 | 0.162 | 0.007 | 0.153 | 0.006 |
| 0.009 | 0.050 | 0.043 | 0.553 | 0.002 | 0.014 | 0.106 | 0.002 | 0.225 | 0.004 | 0.052 | 0.045 | 0.606 | 0.005 | 0.026 | 0.133 | 0.001 | 0.132 | 0.001 |
| 0.018 | 0.009 | 0.018 | 0.086 | 0.001 | 0.004 | 0.052 | 0.004 | 0.813 | 0.012 | 0.013 | 0.023 | 0.119 | 0.004 | 0.008 | 0.141 | 0.001 | 0.685 | 0.006 |
| 0.012 | 0.013 | 0.058 | 0.580 | 0.000 | 0.004 | 0.010 | 0.001 | 0.326 | 0.007 | 0.013 | 0.057 | 0.697 | 0.000 | 0.009 | 0.022 | 0.000 | 0.198 | 0.002 |
| 0.018 | 0.019 | 0.077 | 0.547 | 0.000 | 0.007 | 0.015 | 0.002 | 0.322 | 0.010 | 0.022 | 0.087 | 0.624 | 0.000 | 0.015 | 0.028 | 0.001 | 0.220 | 0.004 |
| 0.028 | 0.015 | 0.050 | 0.363 | 0.001 | 0.028 | 0.059 | 0.004 | 0.466 | 0.015 | 0.019 | 0.058 | 0.507 | 0.003 | 0.044 | 0.135 | 0.001 | 0.230 | 0.005 |
| 0.020 | 0.011 | 0.032 | 0.753 | 0.000 | 0.005 | 0.001 | 0.001 | 0.188 | 0.009 | 0.009 | 0.049 | 0.867 | 0.001 | 0.006 | 0.003 | 0.001 | 0.063 | 0.002 |
| 0.021 | 0.082 | 0.087 | 0.366 | 0.018 | 0.046 | 0.169 | 0.017 | 0.202 | 0.013 | 0.082 | 0.090 | 0.351 | 0.038 | 0.098 | 0.186 | 0.007 | 0.144 | 0.005 |
| 0.008 | 0.055 | 0.044 | 0.541 | 0.003 | 0.016 | 0.117 | 0.002 | 0.219 | 0.003 | 0.058 | 0.045 | 0.584 | 0.006 | 0.030 | 0.159 | 0.000 | 0.118 | 0.001 |
| 0.018 | 0.009 | 0.017 | 0.074 | 0.001 | 0.005 | 0.069 | 0.004 | 0.809 | 0.012 | 0.012 | 0.021 | 0.101 | 0.005 | 0.011 | 0.182 | 0.001 | 0.661 | 0.005 |
| 0.013 | 0.012 | 0.055 | 0.585 | 0.000 | 0.005 | 0.012 | 0.001 | 0.323 | 0.007 | 0.013 | 0.052 | 0.709 | 0.000 | 0.009 | 0.026 | 0.000 | 0.188 | 0.002 |
| 0.018 | 0.019 | 0.076 | 0.557 | 0.000 | 0.008 | 0.016 | 0.002 | 0.313 | 0.010 | 0.021 | 0.086 | 0.631 | 0.000 | 0.015 | 0.030 | 0.001 | 0.212 | 0.004 |
| 0.029 | 0.014 | 0.045 | 0.378 | 0.001 | 0.034 | 0.069 | 0.004 | 0.441 | 0.015 | 0.018 | 0.051 | 0.517 | 0.003 | 0.051 | 0.150 | 0.001 | 0.205 | 0.004 |
| 0.026 | 0.008 | 0.033 | 0.724 | 0.000 | 0.005 | 0.001 | 0.001 | 0.217 | 0.010 | 0.008 | 0.055 | 0.814 | 0.002 | 0.009 | 0.004 | 0.002 | 0.101 | 0.006 |
| 0.021 | 0.078 | 0.085 | 0.346 | 0.022 | 0.056 | 0.190 | 0.013 | 0.198 | 0.011 | 0.069 | 0.078 | 0.334 | 0.054 | 0.137 | 0.191 | 0.005 | 0.128 | 0.004 |
| 0.007 | 0.057 | 0.043 | 0.554 | 0.003 | 0.018 | 0.124 | 0.001 | 0.197 | 0.003 | 0.064 | 0.043 | 0.576 | 0.006 | 0.036 | 0.173 | 0.000 | 0.100 | 0.001 |
| 0.019 | 0.008 | 0.016 | 0.066 | 0.002 | 0.006 | 0.096 | 0.003 | 0.792 | 0.011 | 0.010 | 0.019 | 0.091 | 0.007 | 0.016 | 0.244 | 0.001 | 0.607 | 0.005 |
| 0.013 | 0.011 | 0.049 | 0.594 | 0.000 | 0.006 | 0.014 | 0.001 | 0.318 | 0.006 | 0.011 | 0.047 | 0.720 | 0.000 | 0.012 | 0.035 | 0.000 | 0.173 | 0.002 |
| 0.019 | 0.018 | 0.073 | 0.551 | 0.000 | 0.009 | 0.018 | 0.002 | 0.321 | 0.009 | 0.019 | 0.079 | 0.643 | 0.000 | 0.018 | 0.039 | 0.001 | 0.198 | 0.003 |
| 0.029 | 0.014 | 0.043 | 0.412 | 0.001 | 0.038 | 0.080 | 0.003 | 0.394 | 0.014 | 0.015 | 0.045 | 0.517 | 0.002 | 0.060 | 0.176 | 0.001 | 0.181 | 0.003 |
| 0.044 | 0.004 | 0.033 | 0.638 | 0.000 | 0.008 | 0.003 | 0.003 | 0.289 | 0.021 | 0.003 | 0.034 | 0.725 | 0.000 | 0.025 | 0.003 | 0.001 | 0.186 | 0.024 |
| 0.017 | 0.071 | 0.083 | 0.329 | 0.034 | 0.083 | 0.206 | 0.012 | 0.172 | 0.009 | 0.067 | 0.078 | 0.317 | 0.059 | 0.147 | 0.209 | 0.004 | 0.115 | 0.004 |
| 0.002 | 0.060 | 0.039 | 0.556 | 0.003 | 0.020 | 0.131 | 0.001 | 0.187 | 0.002 | 0.061 | 0.039 | 0.600 | 0.006 | 0.040 | 0.179 | 0.000 | 0.075 | 0.000 |
| 0.018 | 0.008 | 0.014 | 0.060 | 0.003 | 0.008 | 0.140 | 0.003 | 0.756 | 0.009 | 0.010 | 0.017 | 0.081 | 0.011 | 0.026 | 0.347 | 0.001 | 0.505 | 0.004 |
| 0.013 | 0.010 | 0.044 | 0.595 | 0.000 | 0.008 | 0.020 | 0.001 | 0.317 | 0.005 | 0.010 | 0.043 | 0.713 | 0.000 | 0.018 | 0.055 | 0.000 | 0.159 | 0.001 |
| 0.019 | 0.015 | 0.064 | 0.556 | 0.000 | 0.011 | 0.024 | 0.001 | 0.320 | 0.008 | 0.013 | 0.062 | 0.665 | 0.001 | 0.024 | 0.058 | 0.000 | 0.174 | 0.002 |
| 0.028 | 0.013 | 0.040 | 0.440 | 0.001 | 0.046 | 0.104 | 0.003 | 0.340 | 0.013 | 0.011 | 0.035 | 0.484 | 0.003 | 0.077 | 0.244 | 0.000 | 0.143 | 0.002 |
| 0.043 | 0.003 | 0.015 | 0.487 | 0.000 | 0.062 | 0.007 | 0.002 | 0.408 | 0.015 | 0.009 | 0.040 | 0.686 | 0.001 | 0.021 | 0.010 | 0.003 | 0.212 | 0.019 |

Rotamer probabilities for leucine beta strand region by phi (vertical) and psi (horizontal) see methods for rotamer nomenclature

|       |      | 110   |       |       |       |       |       |       |       | 120   |       |       |       |       |       |       |       |       |
|-------|------|-------|-------|-------|-------|-------|-------|-------|-------|-------|-------|-------|-------|-------|-------|-------|-------|-------|
|       |      | MM    | MP    | MT    | PM    | PP    | PT    | TM    | TP    | TT    | MM    | MP    | MT    | PM    | PP    | PT    | TM    | TP    |
| Ceder |      | 0.059 | 0.055 | 0.458 | 0.002 | 0.005 | 0.045 | 0.064 | 0.248 | 0.064 | 0.055 | 0.051 | 0.450 | 0.003 | 0.007 | 0.060 | 0.063 | 0.263 |
| Charm |      | 0.018 | 0.012 | 0.453 | 0.000 | 0.000 | 0.001 | 0.030 | 0.463 | 0.022 | 0.017 | 0.011 | 0.445 | 0.000 | 0.000 | 0.002 | 0.031 | 0.474 |
| Amber |      | 0.009 | 0.010 | 0.163 | 0.000 | 0.000 | 0.005 | 0.050 | 0.721 | 0.043 | 0.009 | 0.010 | 0.187 | 0.000 | 0.000 | 0.009 | 0.044 | 0.712 |
| Hf    |      | 0.007 | 0.018 | 0.516 | 0.000 | 0.000 | 0.001 | 0.010 | 0.418 | 0.031 | 0.008 | 0.022 | 0.605 | 0.000 | 0.000 | 0.001 | 0.006 | 0.341 |
| Dft   |      | 0.012 | 0.020 | 0.548 | 0.000 | 0.001 | 0.003 | 0.017 | 0.340 | 0.059 | 0.014 | 0.023 | 0.646 | 0.000 | 0.001 | 0.004 | 0.010 | 0.274 |
| Mp2   |      | 0.018 | 0.020 | 0.574 | 0.000 | 0.000 | 0.002 | 0.025 | 0.309 | 0.051 | 0.020 | 0.023 | 0.652 | 0.000 | 0.001 | 0.002 | 0.014 | 0.264 |
| Dun   | -110 | 0.008 | 0.040 | 0.395 | 0.000 | 0.000 | 0.000 | 0.006 | 0.500 | 0.051 | 0.006 | 0.037 | 0.387 | 0.000 | 0.000 | 0.000 | 0.008 | 0.521 |
| Ceder |      | 0.052 | 0.034 | 0.484 | 0.002 | 0.005 | 0.044 | 0.065 | 0.262 | 0.052 | 0.052 | 0.035 | 0.484 | 0.003 | 0.007 | 0.059 | 0.061 | 0.249 |
| Charm |      | 0.016 | 0.010 | 0.419 | 0.000 | 0.000 | 0.001 | 0.035 | 0.496 | 0.024 | 0.014 | 0.009 | 0.387 | 0.000 | 0.000 | 0.002 | 0.034 | 0.532 |
| Amber |      | 0.007 | 0.006 | 0.175 | 0.000 | 0.000 | 0.005 | 0.052 | 0.713 | 0.043 | 0.007 | 0.006 | 0.204 | 0.000 | 0.000 | 0.009 | 0.046 | 0.699 |
| Hf    |      | 0.007 | 0.014 | 0.519 | 0.000 | 0.000 | 0.001 | 0.011 | 0.417 | 0.032 | 0.009 | 0.017 | 0.608 | 0.000 | 0.000 | 0.001 | 0.006 | 0.340 |
| Dft   |      | 0.011 | 0.018 | 0.583 | 0.000 | 0.001 | 0.003 | 0.016 | 0.314 | 0.055 | 0.013 | 0.022 | 0.666 | 0.000 | 0.002 | 0.004 | 0.009 | 0.257 |
| Mp2   |      | 0.016 | 0.019 | 0.630 | 0.000 | 0.000 | 0.001 | 0.022 | 0.264 | 0.046 | 0.019 | 0.022 | 0.696 | 0.000 | 0.001 | 0.002 | 0.012 | 0.226 |
| Dun   | -120 | 0.001 | 0.030 | 0.371 | 0.000 | 0.000 | 0.000 | 0.005 | 0.538 | 0.055 | 0.006 | 0.029 | 0.360 | 0.000 | 0.000 | 0.000 | 0.003 | 0.552 |
| Ceder |      | 0.032 | 0.018 | 0.508 | 0.003 | 0.007 | 0.062 | 0.069 | 0.235 | 0.067 | 0.031 | 0.017 | 0.498 | 0.003 | 0.008 | 0.077 | 0.064 | 0.252 |
| Charm |      | 0.007 | 0.006 | 0.325 | 0.000 | 0.000 | 0.001 | 0.041 | 0.592 | 0.027 | 0.006 | 0.006 | 0.304 | 0.000 | 0.000 | 0.002 | 0.042 | 0.616 |
| Amber |      | 0.003 | 0.002 | 0.149 | 0.000 | 0.000 | 0.005 | 0.056 | 0.739 | 0.046 | 0.003 | 0.003 | 0.174 | 0.000 | 0.000 | 0.009 | 0.050 | 0.730 |
| Hf    |      | 0.006 | 0.011 | 0.477 | 0.000 | 0.000 | 0.001 | 0.012 | 0.456 | 0.038 | 0.007 | 0.012 | 0.565 | 0.000 | 0.001 | 0.001 | 0.007 | 0.383 |
| Dft   |      | 0.010 | 0.017 | 0.564 | 0.000 | 0.001 | 0.003 | 0.017 | 0.329 | 0.060 | 0.012 | 0.018 | 0.654 | 0.000 | 0.002 | 0.004 | 0.011 | 0.266 |
| Mp2   |      | 0.020 | 0.013 | 0.591 | 0.000 | 0.000 | 0.002 | 0.026 | 0.292 | 0.057 | 0.024 | 0.014 | 0.661 | 0.000 | 0.001 | 0.003 | 0.015 | 0.256 |
| Dun   | -130 | 0.001 | 0.014 | 0.267 | 0.000 | 0.000 | 0.000 | 0.007 | 0.624 | 0.086 | 0.003 | 0.024 | 0.278 | 0.000 | 0.000 | 0.000 | 0.004 | 0.613 |
| Ceder |      | 0.013 | 0.011 | 0.437 | 0.003 | 0.009 | 0.081 | 0.085 | 0.289 | 0.074 | 0.013 | 0.010 | 0.408 | 0.004 | 0.012 | 0.103 | 0.073 | 0.311 |
| Charm |      | 0.002 | 0.003 | 0.220 | 0.000 | 0.000 | 0.001 | 0.050 | 0.691 | 0.032 | 0.002 | 0.003 | 0.207 | 0.000 | 0.000 | 0.003 | 0.052 | 0.707 |
| Amber |      | 0.001 | 0.001 | 0.115 | 0.000 | 0.000 | 0.005 | 0.060 | 0.771 | 0.047 | 0.001 | 0.001 | 0.137 | 0.000 | 0.000 | 0.010 | 0.054 | 0.765 |
| Hf    |      | 0.003 | 0.008 | 0.339 | 0.000 | 0.000 | 0.001 | 0.017 | 0.579 | 0.053 | 0.004 | 0.010 | 0.421 | 0.000 | 0.001 | 0.002 | 0.010 | 0.517 |
| Dft   |      | 0.007 | 0.015 | 0.485 | 0.000 | 0.001 | 0.004 | 0.022 | 0.391 | 0.076 | 0.009 | 0.016 | 0.556 | 0.000 | 0.003 | 0.006 | 0.015 | 0.350 |
| Mp2   |      | 0.012 | 0.013 | 0.520 | 0.000 | 0.001 | 0.002 | 0.033 | 0.345 | 0.074 | 0.015 | 0.014 | 0.588 | 0.000 | 0.002 | 0.004 | 0.020 | 0.319 |
| Dun   | -140 | 0.001 | 0.013 | 0.115 | 0.000 | 0.000 | 0.000 | 0.023 | 0.766 | 0.083 | 0.001 | 0.012 | 0.146 | 0.000 | 0.000 | 0.000 | 0.021 | 0.735 |

| TT    | 130   |       |       |       |       |       |       |       |       | 140   |       |       |       |       |       |       |       |       |
|-------|-------|-------|-------|-------|-------|-------|-------|-------|-------|-------|-------|-------|-------|-------|-------|-------|-------|-------|
|       | MM    | MP    | MT    | PM    | PP    | PT    | TM    | TP    | TT    | MM    | MP    | MT    | PM    | PP    | PT    | TM    | TP    | TT    |
| 0.049 | 0.061 | 0.058 | 0.435 | 0.004 | 0.010 | 0.081 | 0.058 | 0.260 | 0.033 | 0.063 | 0.059 | 0.465 | 0.007 | 0.016 | 0.100 | 0.034 | 0.234 | 0.021 |
| 0.020 | 0.018 | 0.012 | 0.445 | 0.000 | 0.001 | 0.005 | 0.024 | 0.481 | 0.015 | 0.020 | 0.013 | 0.513 | 0.000 | 0.003 | 0.008 | 0.012 | 0.420 | 0.010 |
| 0.028 | 0.011 | 0.012 | 0.243 | 0.000 | 0.001 | 0.018 | 0.026 | 0.670 | 0.019 | 0.014 | 0.015 | 0.329 | 0.001 | 0.005 | 0.037 | 0.011 | 0.575 | 0.015 |
| 0.017 | 0.010 | 0.028 | 0.720 | 0.000 | 0.001 | 0.002 | 0.002 | 0.227 | 0.010 | 0.012 | 0.031 | 0.829 | 0.000 | 0.003 | 0.003 | 0.001 | 0.117 | 0.005 |
| 0.028 | 0.016 | 0.032 | 0.716 | 0.000 | 0.003 | 0.006 | 0.004 | 0.208 | 0.014 | 0.016 | 0.035 | 0.799 | 0.000 | 0.006 | 0.008 | 0.001 | 0.126 | 0.008 |
| 0.024 | 0.021 | 0.027 | 0.733 | 0.000 | 0.001 | 0.004 | 0.005 | 0.195 | 0.013 | 0.019 | 0.031 | 0.821 | 0.000 | 0.004 | 0.006 | 0.001 | 0.110 | 0.008 |
| 0.041 | 0.010 | 0.054 | 0.518 | 0.000 | 0.000 | 0.000 | 0.007 | 0.377 | 0.034 | 0.011 | 0.078 | 0.739 | 0.000 | 0.000 | 0.000 | 0.002 | 0.143 | 0.028 |
| 0.048 | 0.050 | 0.031 | 0.498 | 0.004 | 0.010 | 0.083 | 0.052 | 0.242 | 0.029 | 0.046 | 0.031 | 0.535 | 0.007 | 0.016 | 0.098 | 0.032 | 0.213 | 0.020 |
| 0.021 | 0.013 | 0.009 | 0.401 | 0.000 | 0.001 | 0.004 | 0.027 | 0.527 | 0.016 | 0.015 | 0.012 | 0.472 | 0.000 | 0.003 | 0.009 | 0.015 | 0.462 | 0.012 |
| 0.028 | 0.009 | 0.007 | 0.255 | 0.000 | 0.002 | 0.018 | 0.027 | 0.662 | 0.020 | 0.010 | 0.008 | 0.340 | 0.001 | 0.006 | 0.037 | 0.012 | 0.571 | 0.016 |
| 0.019 | 0.011 | 0.020 | 0.723 | 0.000 | 0.001 | 0.002 | 0.002 | 0.230 | 0.011 | 0.012 | 0.021 | 0.837 | 0.000 | 0.003 | 0.004 | 0.001 | 0.117 | 0.006 |
| 0.027 | 0.015 | 0.026 | 0.746 | 0.000 | 0.003 | 0.005 | 0.004 | 0.186 | 0.015 | 0.017 | 0.027 | 0.815 | 0.000 | 0.007 | 0.007 | 0.001 | 0.116 | 0.008 |
| 0.022 | 0.024 | 0.025 | 0.760 | 0.000 | 0.002 | 0.004 | 0.005 | 0.168 | 0.013 | 0.026 | 0.024 | 0.828 | 0.000 | 0.005 | 0.007 | 0.001 | 0.101 | 0.008 |
| 0.051 | 0.007 | 0.054 | 0.472 | 0.000 | 0.000 | 0.000 | 0.004 | 0.413 | 0.050 | 0.010 | 0.084 | 0.691 | 0.000 | 0.000 | 0.002 | 0.002 | 0.182 | 0.030 |
| 0.049 | 0.030 | 0.016 | 0.479 | 0.006 | 0.013 | 0.094 | 0.053 | 0.279 | 0.031 | 0.030 | 0.016 | 0.502 | 0.009 | 0.020 | 0.109 | 0.034 | 0.259 | 0.020 |
| 0.024 | 0.006 | 0.006 | 0.317 | 0.000 | 0.001 | 0.005 | 0.036 | 0.607 | 0.020 | 0.007 | 0.007 | 0.368 | 0.000 | 0.004 | 0.011 | 0.020 | 0.569 | 0.014 |
| 0.030 | 0.004 | 0.003 | 0.219 | 0.000 | 0.002 | 0.018 | 0.030 | 0.702 | 0.021 | 0.004 | 0.004 | 0.293 | 0.001 | 0.006 | 0.038 | 0.013 | 0.623 | 0.017 |
| 0.024 | 0.009 | 0.015 | 0.683 | 0.000 | 0.002 | 0.003 | 0.003 | 0.271 | 0.014 | 0.010 | 0.017 | 0.804 | 0.000 | 0.005 | 0.006 | 0.001 | 0.149 | 0.008 |
| 0.033 | 0.015 | 0.018 | 0.740 | 0.000 | 0.005 | 0.006 | 0.004 | 0.196 | 0.017 | 0.017 | 0.021 | 0.801 | 0.000 | 0.010 | 0.010 | 0.002 | 0.130 | 0.010 |
| 0.027 | 0.028 | 0.014 | 0.734 | 0.000 | 0.003 | 0.005 | 0.006 | 0.193 | 0.016 | 0.032 | 0.015 | 0.805 | 0.001 | 0.007 | 0.010 | 0.002 | 0.118 | 0.010 |
| 0.077 | 0.003 | 0.046 | 0.401 | 0.000 | 0.000 | 0.002 | 0.005 | 0.465 | 0.078 | 0.006 | 0.061 | 0.636 | 0.000 | 0.009 | 0.011 | 0.005 | 0.224 | 0.048 |
| 0.065 | 0.012 | 0.010 | 0.397 | 0.007 | 0.017 | 0.124 | 0.063 | 0.331 | 0.039 | 0.011 | 0.010 | 0.420 | 0.012 | 0.030 | 0.145 | 0.040 | 0.308 | 0.024 |
| 0.027 | 0.002 | 0.003 | 0.210 | 0.000 | 0.002 | 0.006 | 0.044 | 0.709 | 0.024 | 0.003 | 0.003 | 0.247 | 0.000 | 0.006 | 0.013 | 0.024 | 0.686 | 0.018 |
| 0.032 | 0.001 | 0.002 | 0.169 | 0.000 | 0.002 | 0.019 | 0.032 | 0.754 | 0.021 | 0.001 | 0.002 | 0.231 | 0.001 | 0.006 | 0.037 | 0.014 | 0.690 | 0.018 |
| 0.035 | 0.005 | 0.012 | 0.557 | 0.000 | 0.003 | 0.005 | 0.004 | 0.392 | 0.022 | 0.005 | 0.014 | 0.709 | 0.000 | 0.010 | 0.011 | 0.001 | 0.235 | 0.013 |
| 0.045 | 0.011 | 0.018 | 0.636 | 0.000 | 0.008 | 0.009 | 0.007 | 0.285 | 0.026 | 0.012 | 0.021 | 0.709 | 0.001 | 0.018 | 0.016 | 0.003 | 0.202 | 0.017 |
| 0.038 | 0.018 | 0.015 | 0.660 | 0.000 | 0.005 | 0.008 | 0.009 | 0.259 | 0.025 | 0.020 | 0.017 | 0.737 | 0.001 | 0.014 | 0.017 | 0.003 | 0.175 | 0.016 |
| 0.084 | 0.001 | 0.019 | 0.242 | 0.000 | 0.002 | 0.007 | 0.018 | 0.612 | 0.099 | 0.005 | 0.028 | 0.478 | 0.000 | 0.024 | 0.019 | 0.010 | 0.363 | 0.072 |

| 150   |       |       |       |       |       |       |       |       | 160   |       |       |       |       |       |       |       |       |
|-------|-------|-------|-------|-------|-------|-------|-------|-------|-------|-------|-------|-------|-------|-------|-------|-------|-------|
| MM    | MP    | MT    | PM    | PP    | PT    | TM    | TP    | TT    | MM    | MP    | MT    | PM    | PP    | PT    | TM    | TP    | TT    |
| 0.073 | 0.062 | 0.488 | 0.013 | 0.032 | 0.113 | 0.014 | 0.194 | 0.010 | 0.073 | 0.056 | 0.520 | 0.023 | 0.056 | 0.128 | 0.004 | 0.136 | 0.003 |
| 0.023 | 0.015 | 0.596 | 0.001 | 0.008 | 0.014 | 0.004 | 0.336 | 0.004 | 0.021 | 0.016 | 0.699 | 0.001 | 0.022 | 0.026 | 0.001 | 0.213 | 0.001 |
| 0.017 | 0.018 | 0.455 | 0.003 | 0.012 | 0.072 | 0.003 | 0.412 | 0.008 | 0.018 | 0.019 | 0.560 | 0.007 | 0.031 | 0.115 | 0.000 | 0.247 | 0.002 |
| 0.013 | 0.032 | 0.886 | 0.000 | 0.006 | 0.005 | 0.000 | 0.056 | 0.002 | 0.012 | 0.028 | 0.913 | 0.000 | 0.012 | 0.009 | 0.000 | 0.024 | 0.000 |
| 0.017 | 0.038 | 0.839 | 0.001 | 0.012 | 0.011 | 0.000 | 0.080 | 0.003 | 0.018 | 0.039 | 0.860 | 0.001 | 0.024 | 0.014 | 0.000 | 0.043 | 0.001 |
| 0.021 | 0.033 | 0.873 | 0.001 | 0.009 | 0.013 | 0.000 | 0.049 | 0.002 | 0.021 | 0.030 | 0.881 | 0.001 | 0.020 | 0.022 | 0.000 | 0.023 | 0.000 |
| 0.012 | 0.079 | 0.867 | 0.000 | 0.000 | 0.000 | 0.000 | 0.031 | 0.010 | 0.010 | 0.070 | 0.906 | 0.000 | 0.004 | 0.001 | 0.000 | 0.008 | 0.000 |
| 0.050 | 0.031 | 0.536 | 0.014 | 0.033 | 0.116 | 0.013 | 0.198 | 0.009 | 0.051 | 0.032 | 0.572 | 0.023 | 0.057 | 0.127 | 0.004 | 0.130 | 0.003 |
| 0.017 | 0.013 | 0.563 | 0.001 | 0.009 | 0.017 | 0.005 | 0.370 | 0.005 | 0.018 | 0.013 | 0.664 | 0.002 | 0.025 | 0.026 | 0.002 | 0.250 | 0.001 |
| 0.013 | 0.010 | 0.459 | 0.003 | 0.014 | 0.072 | 0.003 | 0.417 | 0.009 | 0.013 | 0.010 | 0.552 | 0.008 | 0.038 | 0.114 | 0.000 | 0.262 | 0.003 |
| 0.012 | 0.019 | 0.897 | 0.000 | 0.007 | 0.007 | 0.000 | 0.056 | 0.002 | 0.011 | 0.016 | 0.920 | 0.000 | 0.016 | 0.011 | 0.000 | 0.026 | 0.000 |
| 0.018 | 0.027 | 0.853 | 0.001 | 0.014 | 0.011 | 0.000 | 0.073 | 0.003 | 0.019 | 0.025 | 0.870 | 0.001 | 0.029 | 0.016 | 0.000 | 0.041 | 0.001 |
| 0.030 | 0.025 | 0.868 | 0.001 | 0.011 | 0.014 | 0.000 | 0.048 | 0.002 | 0.031 | 0.021 | 0.865 | 0.002 | 0.028 | 0.027 | 0.000 | 0.025 | 0.000 |
| 0.017 | 0.084 | 0.852 | 0.000 | 0.007 | 0.003 | 0.000 | 0.033 | 0.005 | 0.018 | 0.075 | 0.866 | 0.000 | 0.027 | 0.003 | 0.000 | 0.011 | 0.000 |
| 0.033 | 0.017 | 0.523 | 0.016 | 0.040 | 0.134 | 0.014 | 0.212 | 0.011 | 0.031 | 0.016 | 0.553 | 0.030 | 0.071 | 0.145 | 0.004 | 0.146 | 0.003 |
| 0.008 | 0.009 | 0.453 | 0.001 | 0.013 | 0.019 | 0.007 | 0.483 | 0.006 | 0.009 | 0.011 | 0.547 | 0.002 | 0.036 | 0.033 | 0.003 | 0.357 | 0.002 |
| 0.005 | 0.006 | 0.407 | 0.004 | 0.017 | 0.076 | 0.003 | 0.473 | 0.010 | 0.005 | 0.006 | 0.494 | 0.009 | 0.047 | 0.125 | 0.001 | 0.310 | 0.003 |
| 0.010 | 0.018 | 0.869 | 0.000 | 0.012 | 0.011 | 0.000 | 0.078 | 0.002 | 0.009 | 0.017 | 0.883 | 0.001 | 0.032 | 0.020 | 0.000 | 0.039 | 0.000 |
| 0.018 | 0.023 | 0.824 | 0.001 | 0.022 | 0.014 | 0.000 | 0.094 | 0.004 | 0.017 | 0.023 | 0.844 | 0.001 | 0.039 | 0.020 | 0.000 | 0.055 | 0.001 |
| 0.033 | 0.016 | 0.852 | 0.002 | 0.018 | 0.019 | 0.000 | 0.058 | 0.003 | 0.028 | 0.016 | 0.843 | 0.003 | 0.042 | 0.037 | 0.000 | 0.030 | 0.001 |
| 0.016 | 0.055 | 0.814 | 0.000 | 0.035 | 0.021 | 0.000 | 0.047 | 0.011 | 0.020 | 0.061 | 0.802 | 0.001 | 0.072 | 0.031 | 0.000 | 0.012 | 0.001 |
| 0.011 | 0.010 | 0.459 | 0.023 | 0.054 | 0.166 | 0.017 | 0.248 | 0.012 | 0.010 | 0.010 | 0.483 | 0.040 | 0.094 | 0.186 | 0.005 | 0.168 | 0.004 |
| 0.003 | 0.004 | 0.333 | 0.001 | 0.016 | 0.024 | 0.009 | 0.601 | 0.008 | 0.003 | 0.005 | 0.430 | 0.002 | 0.044 | 0.042 | 0.004 | 0.467 | 0.003 |
| 0.001 | 0.003 | 0.326 | 0.004 | 0.018 | 0.080 | 0.004 | 0.553 | 0.011 | 0.001 | 0.003 | 0.400 | 0.010 | 0.056 | 0.141 | 0.001 | 0.385 | 0.003 |
| 0.005 | 0.015 | 0.790 | 0.001 | 0.024 | 0.022 | 0.000 | 0.139 | 0.004 | 0.004 | 0.015 | 0.800 | 0.001 | 0.060 | 0.039 | 0.000 | 0.081 | 0.001 |
| 0.012 | 0.022 | 0.735 | 0.002 | 0.041 | 0.027 | 0.001 | 0.154 | 0.007 | 0.010 | 0.023 | 0.744 | 0.002 | 0.078 | 0.041 | 0.000 | 0.099 | 0.002 |
| 0.019 | 0.018 | 0.784 | 0.004 | 0.037 | 0.035 | 0.001 | 0.097 | 0.006 | 0.014 | 0.017 | 0.739 | 0.006 | 0.091 | 0.074 | 0.000 | 0.057 | 0.001 |
| 0.009 | 0.032 | 0.676 | 0.001 | 0.102 | 0.049 | 0.001 | 0.108 | 0.021 | 0.008 | 0.058 | 0.612 | 0.002 | 0.206 | 0.087 | 0.000 | 0.026 | 0.001 |
